# Supplementary material for: Carbon footprint and greenhouse gas emissions from rice based agricultural systems calculated with a co-designed carbon footprint calculation tool
Source: Copernicus journal article supplement (doi:10.5194/bg-2023-165), 2023-09-26
Supplement: Supplementary file [file bg-2023-165-RC1-supplement.pdf]

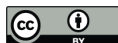

1 **Carbon footprint and greenhouse gas emissions from rice based agricultural systems**  
2 **calculated with a co-designed carbon footprint calculation tool**

3

4 Mohammad Mofizur rahman Jahangir<sup>1,6,\*</sup>, Eduardo Aguilera<sup>2</sup>, Jannatul Ferdous<sup>1</sup>, Farah  
5 Mahjabin<sup>1</sup>, Abdullah Al Asif<sup>1</sup>, Hassan Ahmad<sup>3</sup>, , Maximilian Bauer<sup>4</sup>, Alberto Sanz Cobeña<sup>2</sup>,  
6 Christoph Müller<sup>5,6,7</sup>, Mohammad Zaman<sup>3</sup>

7

8 <sup>1</sup>Department of Soil Science, Bangladesh Agricultural University, Mymensingh-2202,

9 <sup>2</sup>CEIGRAM, Universidad Politécnica de Madrid, Madrid, España

10 <sup>3</sup>Soil and Water Management & Crop Nutrition, Joint FAO/IAEA Division of Nuclear  
11 Techniques in Food & Agriculture, Vienna, Austria

12 <sup>4</sup>Department of Chemistry, Leibniz Universität Hannover, Germany

13 <sup>5</sup>Institute of Plant Ecology (IFZ), Justus-Liebig University Giessen, Germany

14 <sup>6</sup>Liebig Centre for Agroecology and Climate Impact Research, Justus Liebig University,  
15 Germany

16 <sup>7</sup>School of Biology and Environmental Science and Earth Institute, University College Dublin,  
17 Belfield, Dublin 4, Ireland

18

19 \*Corresponding author,

20 [mmrjahangir@bau.edu.bd](mailto:mmrjahangir@bau.edu.bd)

21 Department of Soil Science

22 Bangladesh Agricultural University,

23 Mymensingh-2202, Bangladesh

24 Fax: +880 91 61510

25 Cell: +880 1719648448

26

27

28

29

30



31 **Abstract**

32 There are many cropping systems followed in Floodplain soils for enhancing cropping intensity  
33 for increasing crop production, but greenhouse gas (GHG) emissions balances of agricultural  
34 systems are rarely reported. To estimate the carbon (C) footprints of agricultural products a co-  
35 designed C footprint calculation tool with a life cycle assessment approach was used in major  
36 cropping systems in Bangladesh: rice-rice-rice (R-R-R/boro-*aus*-aman), rice-fallow-rice (R-F-  
37 R/*boro*-fallow-*aman*), maize-fallow-rice (M-F-R), wheat-mungbean-rice (W-M-R), and  
38 potato-rice-fallow (P-R-F). GHG emissions were estimated using the tool along with the field  
39 measurements. It was found that rice-based cropping pattern with dryland crops had higher  
40 nitrous oxide (N<sub>2</sub>O) emissions (3.98 in maize, 3.89 in potato and 0.72 kg N<sub>2</sub>O-N ha<sup>-1</sup> in  
41 mungbean) than sole rice-based (0.73 in boro, 0.57 in *aus* and 1.94 kg N<sub>2</sub>O-N ha<sup>-1</sup> in aman)  
42 cropping systems but methane (CH<sub>4</sub>) emissions were higher in sole rice-based patterns than  
43 dryland crops. Methane contributed to about 50-80% of total GHG emissions from rice  
44 cultivation due to waterlogging conditions throughout the season. In R-R-R and R-F-R  
45 cropping patterns, the only ones including *boro rice*, had the highest total C footprint with 26.3  
46 and 19.5 Mg CO<sub>2</sub>e ha<sup>-1</sup>, respectively while the P-F-R and M-F-R had the lowest C footprint  
47 with 13 Mg CO<sub>2</sub>e ha<sup>-1</sup>. Changes in soil organic C generally had a minor influence on C  
48 footprints in the studied systems, and only boro and *aus* from R-F-R and R-R-R patterns were  
49 relatively more suitable for reducing C footprint as they sequestered C in soil. Measured CH<sub>4</sub>  
50 and N<sub>2</sub>O emissions agreed well with IPCC tier 1 estimates, but they were only available for  
51 boro, maize and wheat so further study is required for validation and suggesting suitable GHG  
52 mitigation strategies from agricultural fields.

53 **Keywords:** Carbon footprint, Co-designed Carbon footprint calculation tools, Greenhouse Gas  
54 (GHG) emissions, major cropping patterns

55 **1. Introduction**

56 Agriculture acts as the primary source of economic and food security for developing countries  
57 like Bangladesh. Increasing population and consumption are placing unprecedented demands  
58 on agriculture and natural resources in the region. We are confronted with one of the most  
59 difficult tasks of the twenty-first century: satisfying society's expanding food demands while  
60 decreasing agriculture's environmental impact (Foley et al., 2011). With the advancement of  
61 the 'Green Revolution', the intensive use of different inputs such as synthetic fertilizers,  
62 herbicides, and insecticides have been established as a key strategy aiming optimal  
63 productivity. The agricultural soils of Bangladesh have a deficit in all the nutrients since 1983-



64 84 (Moslehuddin et al., 1997; Sarker et al., 2018) and latest identified limiting nutrient is  
65 manganese (Mn) in 2010. As a result, synthetic fertilizers, commonly urea, are used as the  
66 mandatory source of N to maintain crop stable growth, development, and higher yield.  
67 Excessive N fertilizer application includes groundwater pollution, soil acidification and  
68 particularly the emissions of nitrous oxide (N<sub>2</sub>O), a potent greenhouse gas (Lakshman et al.,  
69 2022) and ammonia (NH<sub>3</sub>), a major air pollutant (Sanz-Cobena et al., 2014).

70 Rice, maize and wheat are the major crops of Bangladesh, where rice is in the top position. In  
71 2020, Bangladesh ranked third in the world in rice cultivated area and production (FAO, 2023).  
72 Rice is a semi-aquatic plant, usually cultivated under complete flooded conditions, providing  
73 an anaerobic environment for methanogens and denitrifiers to degrade organic substances and  
74 reduce nitrate (NO<sub>3</sub><sup>-</sup>), respectively (Jahangir et al., 2022), which enhances the greenhouse gas  
75 (GHG) emissions. Nitrogen loss with water is another key channel responsible for fertilizer N  
76 loss in paddy fields, including surface runoff, leaching, and lateral seepage, accounting for up  
77 to 50% of applied N fertilizer loss (Chen et al., 2014; Liang et al., 2007). The N use efficiency  
78 (NUE) of rice, maize and potato is approximately 30-50%, 33%, and 40–50% respectively  
79 (Sindelar et al., 2015) and the NUE in **water spinach is 28% and 42% in white cabbage** (Šturm  
80 et al., 2010). Organic inputs, such as crop residue, manures, and compost, improve soil fertility,  
81 agricultural productivity, and crop yield by enhancing C sequestration and nutrient  
82 mineralization in the soil (Lin et al., 2018; Sarkar et al., 2019; Abuarab et al., 2019; Gross et  
83 al., 2022). However, organic amendments can cause GHG emissions through different  
84 processes like the priming effect such as methanogenesis, nitrification, and denitrification  
85 (Thangarajan et al., 2013).

86 Rice-based production systems were reported to generate 523 **million grams (Mg)** of CO<sub>2</sub>e per  
87 year, accounting for 8.8-10.2% of total agricultural emissions globally in 2012 (FAO, 2017).  
88 In Bangladesh, GHG emissions from the agriculture sector grew by 80% in the 1990-2017  
89 period (Islam et al., 2020). Furthermore, the country is a net importer of cereals, which is  
90 associated with imports of virtual land, water, and GHG emissions (Udmale et al., 2021).  
91 Agricultural emissions contributed to about 40% of the total emissions of Bangladesh in 2017-  
92 2019, using data from PRIMAP-cfr (Jeffery et al., 2016) while just CH<sub>4</sub> from rice fields  
93 contributes about 7% of GHG emissions. According to FAOSTAT (FAO, 2023), total soil N<sub>2</sub>O  
94 emissions between 1961 and 2020 grew from 1.5 to 4.2 kt N<sub>2</sub>O for manure application, from  
95 4.4 to 11.2 kt N<sub>2</sub>O for crop residues and from 0.3 to 21.4 kt N<sub>2</sub>O for synthetic fertilizers. The  
96 estimation of agricultural emissions in the national GHG inventory of Bangladesh highly relies



97 on (Interdisciplinary Panel for Climate Change) IPCC tier 1 methods, which are mostly desk-  
98 based and cannot work as a standard for any specific region or crop, particularly when  
99 agriculture represents a significant share of total GHG emissions. Therefore, specific regional  
100 data on GHG emissions are necessary to understand and evaluate the contribution of agriculture  
101 to global warming.

102 The C footprint is a measure of the total amount of GHG emissions that is directly and  
103 indirectly caused by an activity or the life stages of a product, and it is generally calculated  
104 using Life Cycle Assessment (LCA), and typically measured in terms of carbon dioxide  
105 equivalents (CO<sub>2</sub>e). A potential answer to slow the pace of climate change could be found in  
106 the quantification and assessment of the degree of C emissions and energy consumption in an  
107 agroecosystem (Yadav et al., 2018). The C footprint has achieved significant acceptance and  
108 application due to its importance in measuring environmental quality and management in  
109 agricultural sectors (Poore and Nemecek, 2018, Aguilera et al., 2021a) and specifically in rice  
110 production (Ahmad et al., 2023). Carbon sequestration or emissions depend on different  
111 factors, and they do not occur in a very specific or simultaneous manner. Due to seasonal  
112 variations in temperature and water regimes, varying lengths of crop growth, and variations in  
113 crop outputs (and yields), energy/feedstock use efficiencies, nutrient (fertilizer) inputs,  
114 residue/carbon returns, and other inputs influencing management activities and production,  
115 rice-based triple cropping systems have complex effects on GHG emissions (Jahangir et al.,  
116 2022). An accounting of net life cycle GHG emissions along with C sequestration in soil is  
117 needed to evaluate strategies of GHG mitigation for rice-dominant cropping, which is a major  
118 contributor to the C footprint of global agriculture.

119 In Bangladesh, the LCA for C footprint has only been done for a specific rice-based cropping  
120 pattern (Alam et al., 2019), however, there is a scarcity of measured and estimated data on  
121 GHG emissions from different cropping patterns, fertilization, and management practices. In  
122 this study, our main aim is to estimate the C footprint for diversified crops and cropping  
123 patterns in Bangladesh using a co-designed C footprint calculation tool. The specific objectives  
124 are to (i) compare GHG emissions and the corresponding C footprint for individual crop in a  
125 season as well as for the whole pattern in a year, and (ii) to evaluate the crops, in particular, or  
126 the cropping system, as a whole, for sequestering C and mitigating C loss.



## 127 **2. Materials and Methods**

128 The C footprint of the main products of major cropping systems in Bangladesh was assessed  
129 through an attributional LCA, using a co-designed calculation tool. The system boundaries  
130 were established “from cradle to farm gate”. The components of the GHG balance include  
131 upstream, direct, and downstream GHG emissions and the soil organic carbon (SOC) balance,  
132 expressed as CO<sub>2</sub>-equivalents (CO<sub>2</sub>e) using 100-year Global Warming Potential (GWP) factors  
133 from the IPCC’s 6<sup>th</sup> Assessment Report (Forster et al., 2021). **Field GHG emissions were**  
134 **estimated through the IPCC tier I method**, which was complemented with field measurements  
135 of emissions in some treatments to assess the reliability of the estimated data. All components  
136 of the net primary production (NPP) in terms of dry matter, C and N **were estimated** to assess  
137 soil C and N inputs. Emissions were allocated between the main product and the residues based  
138 on their corresponding economic value. The studied cropping systems were located in the field  
139 experiments on Soil Science Field Laboratory, Dept. of Soil Science, Bangladesh Agricultural  
140 University, and in farmers’ fields in different regions representing the dominant flood plain  
141 soils of Bangladesh.

142

### 143 **2.1 Co-designed carbon footprint calculation tool**

144 The co-design of the C footprint calculation tool was performed through an iterative process  
145 based on repeated feedback between developers and the FAO-IAEA’s Coordinated Research  
146 Project (CRP) participants. In each meeting, developers explained the novel features and the  
147 users calculated C footprints from selected regions in their countries and suggested  
148 modifications to account for the specific features of their systems. The participants comprised  
149 of 6 research teams (1-4 persons in each team) from 6 countries including Vietnam,  
150 Bangladesh, Pakistan, Argentina, Costa Rica, and Ethiopia. The case studies covered field  
151 experiments and commercial farms with a wide variety of crop types and management  
152 practices, with an emphasis on rice paddies.

153 The tool is built in a Microsoft Excel environment to maximize the range of possible users and  
154 to allow for case-sensitive adjustments by the users. The tool has three main sheets: one for  
155 introducing crop data, one with emission factors and other coefficients (such as allometric and  
156 stoichiometric coefficients of the main crops) and one summarizing the results. Auxiliary  
157 sheets include soil data obtained from the Harmonized World Soil Database 2.0 (FAO and  
158 IIASA, 2023), climate data obtained from CRU TS 4 (Harris et al., 2020), and the electricity



159 mix of each country, gathered from the World Development Indicators database (The World  
160 Bank, 2023).

161 The basic crop data to be introduced includes information on regarding location and main  
162 characteristics of the studied systems, intercropping period and management, crop and residue  
163 production, residue destiny shares (harvest, soil incorporation, burning, grazing), inputs of  
164 fertilizers, pesticides and electricity, number of passes of each machinery task, and prices of  
165 the products and residues. management, emissions, etc.). In the case of rice systems, water  
166 management information in the crop and intercrop period also has to be specified.

167 Crop coefficients include product and residue dry matter content, root:shoot ratio, product,  
168 residue and root C and N content over dry matter, and humification coefficients. Emission  
169 factors from the production of inputs (fertilizers, pesticides, machinery, fuel, electricity) are  
170 based on life cycle inventories (mainly Ecoinvent 3.0) and calculated with SimaPro software.  
171 Soil CH<sub>4</sub> and N<sub>2</sub>O emissions are estimated using tier 1 or tier 2 (CH<sub>4</sub>) methods from the revised  
172 2006 Guidelines for National Inventories of the IPCC (IPCC, 2019).

173 In the results sheet, the soil C and N balances, GHG emissions and C footprints are calculated  
174 for each treatment with the data contained in the Crop Data, Factors, and Auxiliary data sheets.  
175 Potential vegetal biomass growth is estimated with the NCEAS model (Del Grosso et al., 2008),  
176 which is based on yearly water inputs (which in our case correspond to the sum of precipitation  
177 and irrigation). This potential biomass growth is scaled with qualitative information on weed  
178 management to estimate weed biomass production in the intercrop period and during the crop  
179 cycle. The calculation of the SOC balance is described in Section 2.2. The tool is designed to  
180 ensure maximum flexibility in the data availability while reporting the most reliable data. For  
181 example, climate and soil data can be inserted in the tool if they are available, or the tool  
182 retrieve them from global datasets if they are not. Crop residue, roots, and cover crop biomass  
183 are estimated with coefficients if no field measurements are available. In the same way, a  
184 prioritization procedure is implemented for the selection of GHG emission and C sequestration  
185 estimates, choosing measured data if they are available, then tier 2 estimated data, and then tier  
186 1 estimated data.

## 187 2.2. Soil organic carbon balance

188 The SOC balance is calculated with the HSOC model (Aguilera et al., 2018), a dynamic model  
189 built as a simplification of the RothC model (Coleman and Jenkinson, 1996) with 2 active pools  
190 of SOC. This model has soil current SOC stocks, C inputs, input humification coefficients, and



191 monthly temperature, soil water status, and soil cover as the main factors affecting the SOC  
192 balance. In this work, we modified the HSOC model in rice fields using the modifying factors  
193 for SOC mineralization rates from Jiang et al. (2013), to account for slower mineralization rates  
194 under flooded conditions. In order to facilitate the comparability of the data, we assumed that  
195 initial SOC content was equal to the SOC content in equilibrium in the most widespread of the  
196 studied rotations (Rice-Fallow-Rice), and all treatments were calculated as comparison to this  
197 value. In order to incorporate the SOC balance to the GHG balance and C footprint estimations,  
198 we ran the model for 100 years using the management and pedoclimatic data of each treatment  
199 and divided the result by 100 to get a yearly C sequestration rate. This rate was converted to  
200 CO<sub>2</sub>e using the molecular weight ratio of CO<sub>2</sub> to C (3.67). This way, the reported SOC changes  
201 are in line with the other gases of the GHG emission balance, which are reported as 100-year  
202 GWP.

### 203 2.3 Field data: Cropping Patterns and Crop Management

204 The study was carried out on Soil Science Field Laboratory, (24.7471° N, 90.4203° E)  
205 Mymensingh, and farmers' fields at various sites of the country (North, Mid and Mid-west part  
206 of Bangladesh). The regions have a subtropical monsoon climate with a mean annual  
207 temperature of 26 °C, average annual rainfall of 1,800-2200 mm, and relative humidity of 85%  
208 (Local weather stations). The field sites have a noncalcareous dark grey floodplain soil (Aeric  
209 Haplaquept in the U.S. Soil Taxonomy), these soils are very deep and well drained occurs in  
210 Agroecological Zone 9 (AEZ-9; Old Brahmaputra Floodplain soil), AEZ-3, and AEZ-18 (FAO,  
211 1988). The dominant regional soil type was Low Activity Clay (LAC) soil with 14-18% clay  
212 contents. The experiment was done with five different cropping patterns, followed by majority  
213 farmers of this country under conventional cultivation practice. Mid-winter to pre-monsoon  
214 season, monsoon and late monsoon to winter seasons were occupied by boro, T. aus  
215 (Transplanting aus), and T. aman rice growing seasons, respectively. There were also four  
216 dryland crops, wheat, maize, mungbean, and potato. The cropping patterns were rice-rice-rice  
217 (R-R-R/ boro-aus-aman), rice-fallow-rice (R-F-R/ boro-fallow-aman), maize-fallow-rice (M-F-  
218 R), wheat-mungbean-rice (W-M-R), potato-rice-fallow (P-R-F). Rice-fallow-rice (R-F-R) is  
219 the most widely used pattern in Bangladesh. Therefore, it has been used as reference pattern in  
220 the estimation of SOC changes (see Section 2.2). In boro, aus and aman seasons the age of  
221 seedlings was 42, 33 and 35 days, respectively. Wheat, maize, mungbean and potato were direct  
222 seeded crops. The rice fields experienced non-flooded pre-season for less than 50 days before  
223 transplanting of seedlings in most of the rice-based cropping patterns. The fallow period means



224 there was no crop in the field but only spontaneous weed during ~12 weeks from May to  
225 August. Based on the Fertilizer Recommendation Guide (FRG, 2018), the rate of synthetic  
226 fertilizer application was determined for each of the crops. Urea, triple superphosphate (TSP),  
227 and Mouri~~e~~ of Potash (MoP), Gypsum was used as nutrient sources of N, P, K, S. No organic  
228 amendments were used besides crop residue and weed. In rice seasons the straw incorporation  
229 in soil ranged from 10-20 % where it was 100 % for potato. Regarding water management,  
230 aman was rainfed whereas flood irrigation was used for Boro and Aus. Furrow irrigation was  
231 used for maize, and potato. Wheat requires about 1-2 irrigation events, but the land used in that  
232 experiment always remained in wet condition due to topography. Irrigation water was supplied  
233 from ground water by using electric pumps. Machinery was used for land preparation and  
234 spraying of solutions in the field for all the crop seasons. Respective to crops and diseases  
235 herbicides and pesticides were sprayed once in a season.

236

#### 237 **2.4 Greenhouse Gas Sampling**

238 In this study, GHG measurements were conducted in boro rice, wheat and maize fields using  
239 closed chamber method (Jahangir et al., 2022; Zaman et al., 2021). The observation period  
240 began with the first application of urea under continuous flooded conditions and continued  
241 until emissions reached background levels. Chambers made of soda glass and stainless-steel  
242 collars were placed on rice rows, covering four plants to a depth of 10 cm. Neoprene seals  
243 ensured an airtight connection between the chamber lid and the frame. Urea was applied inside  
244 the pre-installed collars using a broadcast method. Gas samples were collected at 0, 30, and 60  
245 minutes after the chamber set up during the day, between 10:00 a.m. and 4:00 p.m., on day 0, 1,  
246 3, 5, 7, 10, 15, and 21 after each split urea application. A 60-ml Luer-Lock syringe with a 25-  
247 gauge needle was used to collect 16-ml gas samples from the chamber headspace, which were  
248 then injected into pre-evacuated 12-ml vials. After storage for up to 7 days, the samples were  
249 analysed using a Varian 3,800 gas chromatograph equipped with specific detectors for N<sub>2</sub>O,  
250 CO<sub>2</sub>, and CH<sub>4</sub> (Jahangir et al., 2022).

#### 251 **2.5 Soil and biomass Sampling and Analysis**

252 Composite soil samples were taken from each replicated plot at a depth of 0-15 cm, using an  
253 auger, four days after the second split application of urea, which coincided with the peak of  
254 N<sub>2</sub>O emissions. The samples were collected from multiple locations near each GHG gas  
255 sampling chamber and stored in sealable plastic bags at 4 °C. In the field, soil pH was measured  
256 using a portable pH meter. A portion of the soil, after removing visible roots and litters through





257 sieving with a 2-mm mesh, was analysed for ammonium ( $\text{NH}_4^+$ ) and nitrate ( $\text{NO}_3^-$ ) contents  
258 using the colorimetric method. Another portion of the soil was air-dried at room temperature  
259 ( $\sim 25^\circ\text{C}$ ) in the shade for two weeks and then processed (2 mm sieved) for analysis of SOC  
260 and total N (TN) using the wet oxidation method and Kjeldahl method, respectively (Jahangir  
261 et al., 2022). The values and corresponding sources used for the crops in this area are available  
262 in Begum et al. (2022), Jahangir et al., (2022) and Ferdous et al. (2023). **To measure grain and**  
263 **residue biomass production,** a  $4\text{ m}^2$  area was chosen at random in the plot area just before  
264 harvest. The plants were cut at ground level, put in mesh bags, and left to air dry. The weights  
265 of the grain and crop residue were calculated after the grain was threshed from the sample. To  
266 assess the water content, a portion of the crop residue was oven dried at  $65^\circ\text{C}$  for 72 hours.  
267 Yields of crop residue were expressed on an oven-dry basis. Paddy grain yields were adjusted  
268 to 12% for rice and 14% moisture for wheat and maize.

### 269 **3. Results**

#### 270 **3.1 Net primary productivity**

271 The R-F-R cropping pattern gave higher dry matter (DM) yield ( $6.05\text{ Mg DM ha}^{-1}$ ) in the boro  
272 season than in the aman ( $4.63\text{ Mg DM ha}^{-1}$ ) season, however the NPP was higher in aman  
273 season including fallow period (Fig. 1a). The NPP was the highest in M-F-R cropping pattern  
274 with  $22.88\text{ Mg DM ha}^{-1}$  in maize and  $17.75\text{ Mg DM ha}^{-1}$  in rice. Weeds were also considered  
275 in NPP of crops. Intercrop weed biomass production was present in the crops which had a  
276 fallow period before their season. Therefore, in potato-based pattern potato had higher NPP  
277 than rice because of having a fallow period before the season. The total NPP was highest in R-  
278 R-R ( $43.42\text{ Mg DM ha}^{-1}$ ) followed by M-F-R ( $40.63\text{ Mg DM ha}^{-1}$ ) and R-F-R ( $37.05\text{ Mg DM}$   
279  $\text{ha}^{-1}\text{ yr}^{-1}$ ) (Fig. 1b). The W-Mu-R has the lowest average productivity ( $8.38\text{ Mg DM ha}^{-1}\text{ yr}^{-1}$ )  
280 with the least yield in mungbean ( $4.26\text{ Mg DM ha}^{-1}$ ).

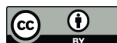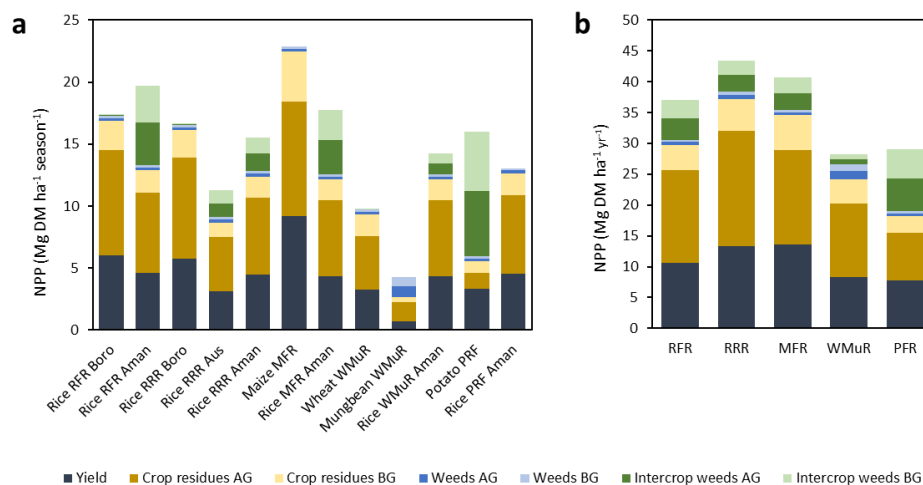

281

282 **Fig. 1** Net primary productivity in the studied conventionally managed crops over their  
 283 cropping season and intercrop period (a) and in their corresponding cropping systems over one  
 284 year (b); DM = Dry Matter, AG = Above Ground, **BG = Below Ground**, RFR = Rice-Fallow-  
 285 Rice, RRR = Rice-Rice-Rice, MFR = Maize-Fallow-Rice, WmuR = Wheat-Mungbean-Rice,  
 286 PFR = Potato-Fallow-Rice

287

### 288 3.2 Nitrogen inputs for crops under different cropping patterns

289 Nitrogen inputs considered for the estimation of direct N<sub>2</sub>O emissions according to IPCC  
 290 guidelines are shown in Fig. 3. Synthetic fertilizer acted as the largest source of N supply for  
 291 all the cropping patterns. The highest amount of N input was at maize, with about 17% of  
 292 synthetic fertilizer used in all the crops (Fig. 3a). For both R-R-R and R-F-R cropping patterns  
 293 the synthetic fertilizer use was higher in boro than other crops, but the total N input was higher  
 294 in aman season for R-F-R pattern while boro had higher N input in R-R-R pattern. However,  
 295 the R-R-R pattern had larger amount of N input than the R-F-R pattern. The P-R-F pattern had  
 296 higher (4-21%) N input (549 kg N ha<sup>-1</sup>yr<sup>-1</sup>) than other patterns where M-F-R came as the second  
 297 largest input of N (528 kg N ha<sup>-1</sup>yr<sup>-1</sup>) (Fig. 3b). In contrast, the least input of N occurred in the  
 298 Wheat-Mungbean-Rice pattern (406 kg N ha<sup>-1</sup>yr<sup>-1</sup>). Both AG and BG crop residue contributed  
 299 higher in R-R-R (71 kg N ha<sup>-1</sup>yr<sup>-1</sup>) than other patterns, P-R-F had the second highest (67 kg N  
 300 ha<sup>-1</sup>yr<sup>-1</sup>) N input from that source. Synthetic fertilizer supplied around 23-78% of the N supply,  
 301 while cover crop (AG + BG) contributed approximately 8-36% of the N supply. Highest



302 contribution from weeds in the intercrop period was found from P-R-F (106.13 kg N ha<sup>-1</sup>  
 303 season<sup>-1</sup>) and then in R-F-R (69.01 kg N ha<sup>-1</sup> season<sup>-1</sup>) pattern. In Bangladesh the common  
 304 cropping pattern is R-F-R but the N input was higher in R-R-R pattern than in R-F-R pattern.  
 305 The **net SOM mineralization** had a minor role in most cropping patterns where mungbean had  
 306 the higher input both as absolute value (59 kg N ha<sup>-1</sup>yr<sup>-1</sup>) and as share of total N input (58%),  
 307 followed by potato (29 kg N ha<sup>-1</sup>yr<sup>-1</sup>). Between R-R-R and R-F-R pattern the aman season had  
 308 the SOM mineralized N input (9-10 kg N ha<sup>-1</sup>yr<sup>-1</sup>) which was about 3% and 2% of total input  
 309 for the cropping patterns, respectively.

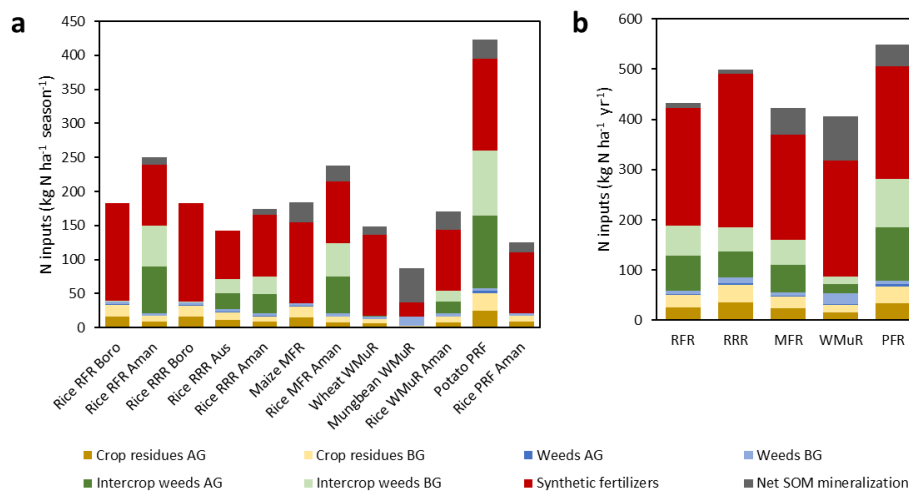

310

311 **Fig. 2** Nitrogen (N) inputs in the studied conventionally managed crops over their cropping  
 312 season and intercrop period (a) and in their corresponding cropping systems over one year (b);  
 313 AG = Above ground, BG = Below ground, SOM = Soil organic matter, RFR = Rice-Fallow-  
 314 Rice, RRR = Rice-Rice-Rice, MFR = Maize-Fallow-Rice, WmuR = Wheat-Mungbean-Rice,  
 315 PFR = Potato-Fallow-Rice

316

### 317 3.3 Soil organic carbon balance

318 As the crops were conventionally managed, organic fertilization was not practiced. Weeds,  
 319 crop residues and cover crops (AG and BG) contributed to the carbon (C) input in all the  
 320 cropping patterns. The P-R-F had the highest C in put (7 kg C ha<sup>-1</sup>yr<sup>-1</sup>) while W-Mu-R pattern  
 321 had the lowest (4 kg C ha<sup>-1</sup>yr<sup>-1</sup>). Between R-F-R (5.76 kg C ha<sup>-1</sup>yr<sup>-1</sup>) and R-R-R (6.13 kg C ha<sup>-1</sup>  
 322 yr<sup>-1</sup>) pattern C input was about 7% higher in R-R-R. Carbon input in boro rice for both R-R-



323 R and R-F-R cropping patterns was about 91-92% **high crop residues** and rest amount came  
 324 from weeds and cover crops. Weeds and cover crops grew during the fallow period (Fig. 4)  
 325 where the crop residue was the largest source of C input for the cropping patterns. The P-R-F,  
 326 M-F-R and R-R-R patterns had about 5-14% higher C input than R-F-R pattern. Humified C  
 327 input was higher in P-R-F pattern (Fig. 4) than other patterns and it was about 14% higher than  
 328 R-F-R pattern.

329 The C stock in equilibrium ranged from 13-90 Mg C ha<sup>-1</sup> (Fig 4a, b). **The boro from R-F-R**  
 330 **season had the highest stock (90 Mg C ha<sup>-1</sup>)** (Fig. 4a). The highest C stocks among cropping  
 331 patterns was achieved in the reference rotation, the R-F-R (76.1 Mg C ha<sup>-1</sup>), similar to the R-  
 332 R-R (74.3 Mg C ha<sup>-1</sup>) (Fig 4b). The R-F-R pattern had 41%, 29% and 38% higher C stock than  
 333 M-F-R, W-Mu-R and P-R-F patterns, respectively. **Aman rice stock more C than potato and**  
 334 **maize but less than wheat in R-F-R pattern.**

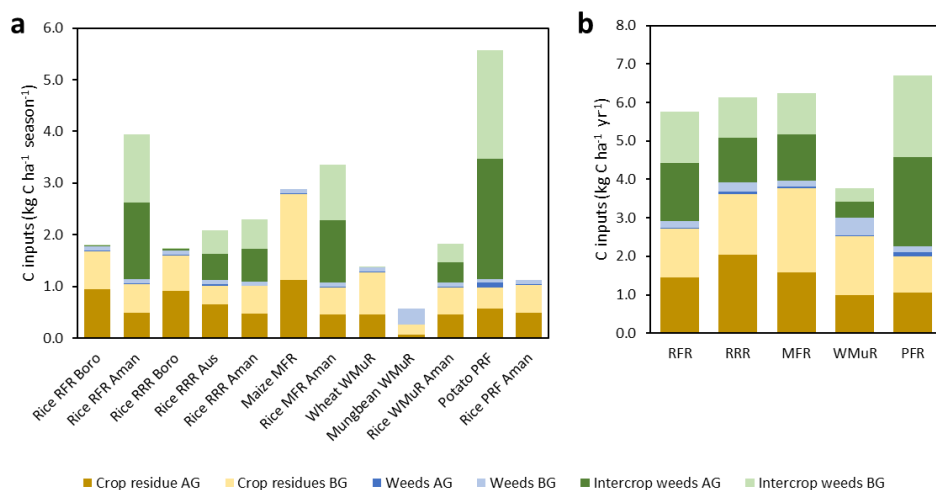

335

336 **Fig. 3** Carbon inputs in the studied conventionally managed crops over their cropping season  
 337 and intercrop period (a) and in their corresponding cropping systems over one year (b); AG =  
 338 Above ground, BG = Below ground, SOM = Soil organic matter, RFR = Rice-Fallow-Rice,  
 339 RRR = Rice-Rice-Rice, MFR = Maize-Fallow-Rice, WmuR = Wheat-Mungbean-Rice, PFR =  
 340 Potato-Fallow-Rice

341 The values of C stock change rate in the studied crops ranged from -0.06 in the boro rice from  
 342 the reference cropping pattern R-F-R to 0.51 Mg C ha<sup>-1</sup> yr<sup>-1</sup> in mungbean (Fig. 4c). The R-R-  
 343 R cropping pattern had zero C stock rate change, reflecting our choice of this pattern as the



344 reference one (Fig. 4d), while the R-R-R pattern also had a value close to zero (0.02 Mg C ha<sup>-1</sup>  
345 yr<sup>-1</sup>). The C stock change rates in the other rotations were very similar, ranging 0.22-0.3 Mg  
346 C ha<sup>-1</sup> yr<sup>-1</sup>.

347

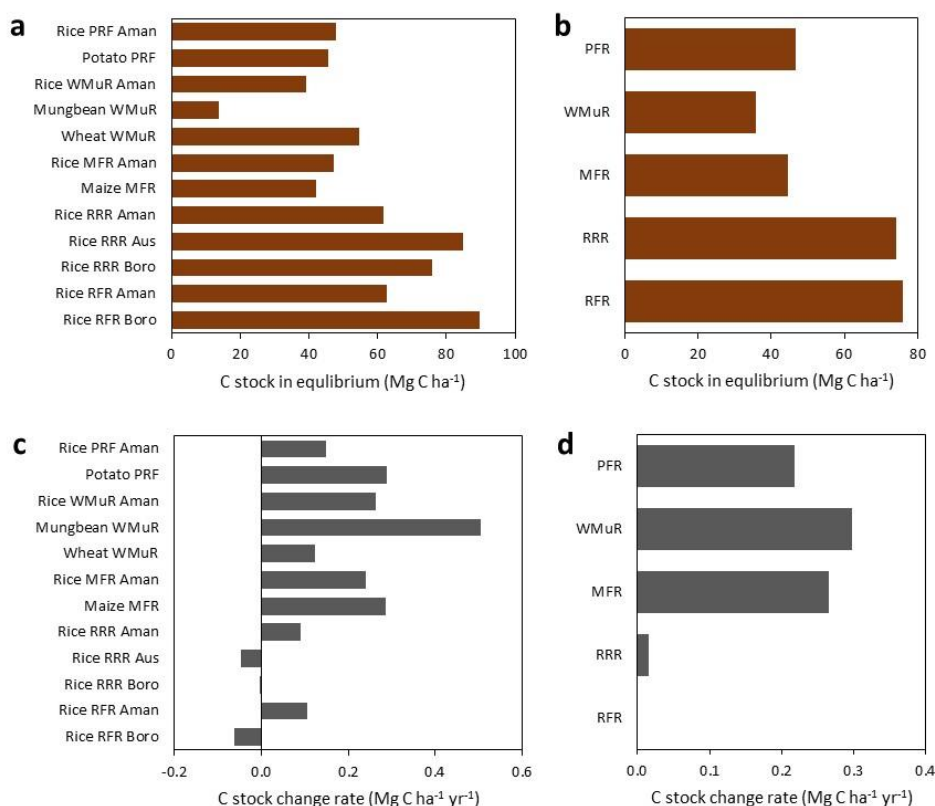

348

349 **Fig. 4** Carbon (C) stock in equilibrium in the studied crops (a) and cropping systems (b), and  
350 C stock change rates in the studied crops (c) and cropping systems (d). RFR = Rice-Fallow-  
351 Rice, RRR = Rice-Rice-Rice, MFR = Maize-Fallow-Rice, WmuR = Wheat-Mungbean-Rice,  
352 PFR = Potato-Fallow-Rice

### 353 3.4 Soil fluxes of trace greenhouse gases

354 The IPCC default and Tier 1 CH<sub>4</sub> emission values are available only for rice cultivation, as it  
355 is assumed to be the only crop grown under waterlogging conditions. However, in field level  
356 we measured CH<sub>4</sub> emissions from boro rice and from wheat fields (Fig. 5). The comparison of  
357 the boro rice measured emissions with the IPCC-based estimates shows that the IPCC tier 1



358 approach resulted in a very similar value ( $376 \text{ kg CH}_4 \text{ ha}^{-1} \text{ yr}^{-1}$ ) to that obtained from  
359 measurements ( $385 \text{ kg CH}_4 \text{ ha}^{-1} \text{ yr}^{-1}$ ), while the IPCC default value was much lower ( $187 \text{ kg}$   
360  $\text{CH}_4 \text{ ha}^{-1} \text{ yr}^{-1}$ ). The wheat field caused  $120 \text{ kg CH}_4 \text{ ha}^{-1} \text{ yr}^{-1}$  emissions. The IPCC Tier 1 values  
361 estimated across all crops indicated that among the rice seasons boro caused the highest  
362 emissions ( $376 \text{ kg CH}_4 \text{ ha}^{-1} \text{ yr}^{-1}$ ) followed by aus ( $189 \text{ kg CH}_4 \text{ ha}^{-1} \text{ yr}^{-1}$ ) and then aman ( $108$   
363  $\text{kg CH}_4 \text{ ha}^{-1} \text{ yr}^{-1}$ ) in R-R-R pattern, however the emissions in R-F-R pattern would be  $382 \text{ kg}$   
364  $\text{CH}_4 \text{ ha}^{-1} \text{ yr}^{-1}$  in boro and  $145 \text{ kg CH}_4 \text{ ha}^{-1} \text{ yr}^{-1}$  in aman.

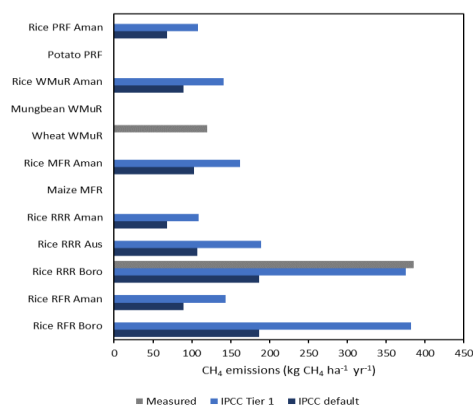

365

366 **Fig. 5** Comparison of three different approaches to estimated methane ( $\text{CH}_4$ ) emissions from  
367 the studied crop fields, including field measured emissions, IPCC Tier 1 approach, and IPCC  
368 default value. RFR = Rice-Fallow-Rice, RRR = Rice-Rice-Rice, MFR = Maize-Fallow-Rice,  
369 WmuR = Wheat-Mungbean-Rice, PFR = Potato-Fallow-Rice

370 The IPCC set a default value for N loss as  $\text{N}_2\text{O}$  from wet (rice) and dry crop (wheat, maize,  
371 potato, mungbean) fields but measured data for  $\text{N}_2\text{O}$  loss was only available for boro, maize  
372 and wheat field (Fig. 6a). In the Indo-Gangetic Plain  $\text{N}_2\text{O}$  loss was estimated by the IPCC Tier  
373 1 method. The Tier 1 estimated value for boro rice is  $0.73 \text{ kg N}_2\text{O-N ha}^{-1} \text{ yr}^{-1}$  while the  
374 estimated value was  $1.08 \text{ kg N}_2\text{O-N ha}^{-1} \text{ yr}^{-1}$ . The Tier 1 value of  $\text{N}_2\text{O}$  emissions for maize was  
375  $2.3 \text{ kg N}_2\text{O-N ha}^{-1} \text{ yr}^{-1}$  but the estimated value was  $2.62 \text{ kg N}_2\text{O-N ha}^{-1} \text{ yr}^{-1}$ . In wheat field  $0.65$   
376  $\text{kg N}_2\text{O-N ha}^{-1} \text{ yr}^{-1}$  emitted as  $\text{N}_2\text{O}$  but the measured value was  $0.31 \text{ kg N}_2\text{O-N ha}^{-1} \text{ yr}^{-1}$ . The  
377 tier 1 value was estimated without considering any crop management practices but from the  
378 experimental plots it was estimated 1.47 and 1.13 times higher  $\text{N}_2\text{O}$  emissions than the tier 1  
379 value in rice and maize field, respectively but in wheat field the measured data was 2.09 times  
380 lower than the Tier 1 value.

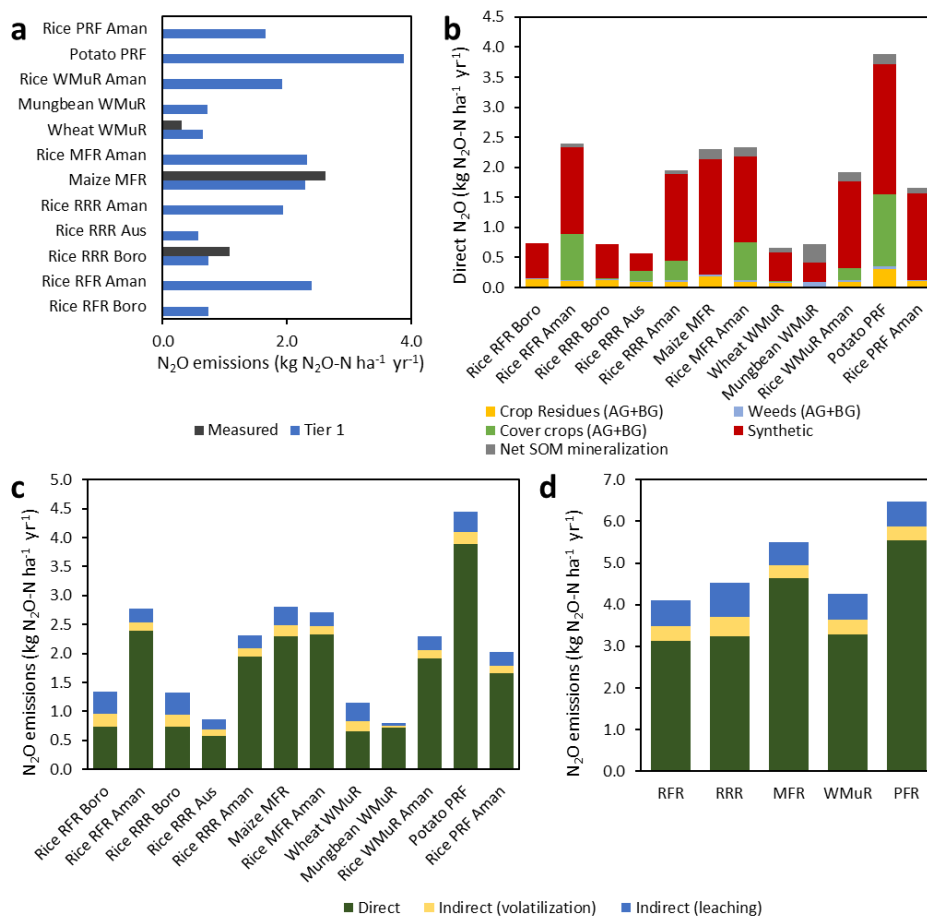

381

382 **Fig. 6** Nitrous oxide ( $N_2O$ ) emissions in the studied crops, including direct  $N_2O$  emissions  
 383 comparing measured and IPCC tier 1 estimations (a), direct  $N_2O$  emission sources by crop (b),  
 384 total  $N_2O$  emission by emission type and crop (c) and total  $N_2O$  emissions by emission type  
 385 and cropping system (d). RFR = Rice-Fallow-Rice, RRR = Rice-Rice-Rice, MFR = Maize-  
 386 Fallow-Rice, WmuR = Wheat-Mungbean-Rice, PFR = Potato-Fallow-Rice

387 Synthetic fertilizers acted as the largest source of  $N_2O$  emission, about 44-90% of total emis-  
 388 sions in the studied patterns (Fig. 6b). The highest emissions were in M-F-R pattern ( $6.31 kg$   
 389  $N_2O-N ha^{-1} yr^{-1}$ ) and P-R-F pattern had the second highest ( $5.54 kg N_2O-N ha^{-1} yr^{-1}$ ). In R-F-R  
 390 pattern, synthetic fertilizers had the least ( $3.13 kg N_2O-N ha^{-1} yr^{-1}$ ) amount of  $N_2O$  emission  
 391 occur where aman caused about 76% emissions. In boro and aman seasons crop residue caused  
 392 about 18% and 4% of emissions, respectively. It could be due to 1-2% of emissions from weeds  
 393 and crop residues in this pattern. The second lowest emissions were from R-R-R pattern where



394 However, M-F-R pattern emitted 1.15–2.6 times higher N<sub>2</sub>O emissions than other crops. **The**  
395 **potato-based pattern has contributed to the second highest amount of total direct N<sub>2</sub>O emission**  
396 **(5.54 kg N<sub>2</sub>O-N ha<sup>-1</sup> yr<sup>-1</sup>) where 23% of emissions occur from synthetic sources.** (Fig. 4a). The  
397 W-Mu-R pattern was the third largest source of total direct N<sub>2</sub>O emission with 3.31 kg N<sub>2</sub>O-N  
398 ha<sup>-1</sup> yr<sup>-1</sup>. The dry land crops maize, potato had higher emissions than wet land crops.

399

400 Among three different types of emission, direct N<sub>2</sub>O emission was the dominant pathway  
401 across cropping patterns, with emissions being 3-19 times and 2-10 times higher than  
402 volatilization and leaching, respectively (Fig. 6c and d). **Between volatilization and leaching**  
403 **loss, higher N<sub>2</sub>O emissions through volatilization were estimated for all the crops.** In case of  
404 **mungbean (1.25 kg N<sub>2</sub>O-N ha<sup>-1</sup> yr<sup>-1</sup>) (Fig. 6c) there was a few leaching causing the lowest total**  
405 **emission in W-Mu-R (6.18 kg N<sub>2</sub>O-N ha<sup>-1</sup> yr<sup>-1</sup>), whereas in R-R-R had the largest value of total**  
406 **emission, approximately 14 kg N<sub>2</sub>O-N ha<sup>-1</sup> yr<sup>-1</sup> (Fig. 6d). The M-F-R pattern holds the second**  
407 **position in terms of overall emission value, with higher emissions in maize (5.83 kg N<sub>2</sub>O-N ha<sup>-1</sup>**  
408 **yr<sup>-1</sup>).**

### 409 3.5 Global warming potential and C footprint

410 **Major portion of the area-based GWP was due to soil CH<sub>4</sub> emission from rice and wheat based**  
411 **cropping patterns, which was about 50-80% of total GWP (Fig. 7a).** The C footprint varied  
412 with the studied crops for different cropping patterns. All the predictors impacted on C  
413 footprint. The R-F-R pattern decreased about 34% C footprint over the R-R-R pattern. Among  
414 the crops boro in R-F-R (12.98 Mg ha<sup>-1</sup>) and R-R-R (12.94 Mg ha<sup>-1</sup>) had higher C footprint  
415 than other crops (Fig.7a). The boro < aman < aus < wheat < maize < potato < mungbean trend  
416 was followed in C footprint. Maize, potato and mungbean had no soil CH<sub>4</sub> emissions. Boro  
417 rice in both R-F-R and R-R-R pattern generated the most CH<sub>4</sub> emissions, around 10.1 – 10.3  
418 Mg CO<sub>2</sub>e ha<sup>-1</sup>, accounting for 40-53% of total emissions, and resulting in the highest GWP  
419 among the studied crops. Therefore, the R-R-R and R-F-R cropping patterns, the only ones  
420 including boro rice, had the highest total GWP, with 26.3 and 19.5 Mg CO<sub>2</sub>e ha<sup>-1</sup>, respectively  
421 (Fig. 7b). The total C footprint varied from 12.34 Mg ha<sup>-1</sup> in P-R-F to 26.29 Mg ha<sup>-1</sup> in R-R-R  
422 (Fig. 7b). The P-F-R and M-F-R had the lowest GWP (13 Mg CO<sub>2</sub>e ha<sup>-1</sup>). Fertilizer production  
423 was the second-largest source of total emissions with 8-30%. Pesticide production contributed  
424 largely in aman season from R-R-R pattern had higher C footprint. During rice season the  
425 irrigation energy contributed to C footprint. Considering all cropping patterns, the role of SOC  
426 was relatively minor in the GWP, which demonstrated a balance between emission and





427 sequestration as compared to the reference cropping pattern R-F-R. The highest share was  
 428 observed for mungbean, in which SOC-related CO<sub>2</sub> emissions represented 53% of the GWP  
 429 due to the combination of high C mineralization, low C input, and low levels of the other  
 430 emissions. Net C sequestration was found in boro (R-F-R) and aus (R-R-R) crop only, although  
 431 it only compensated for 1% of the GWP.

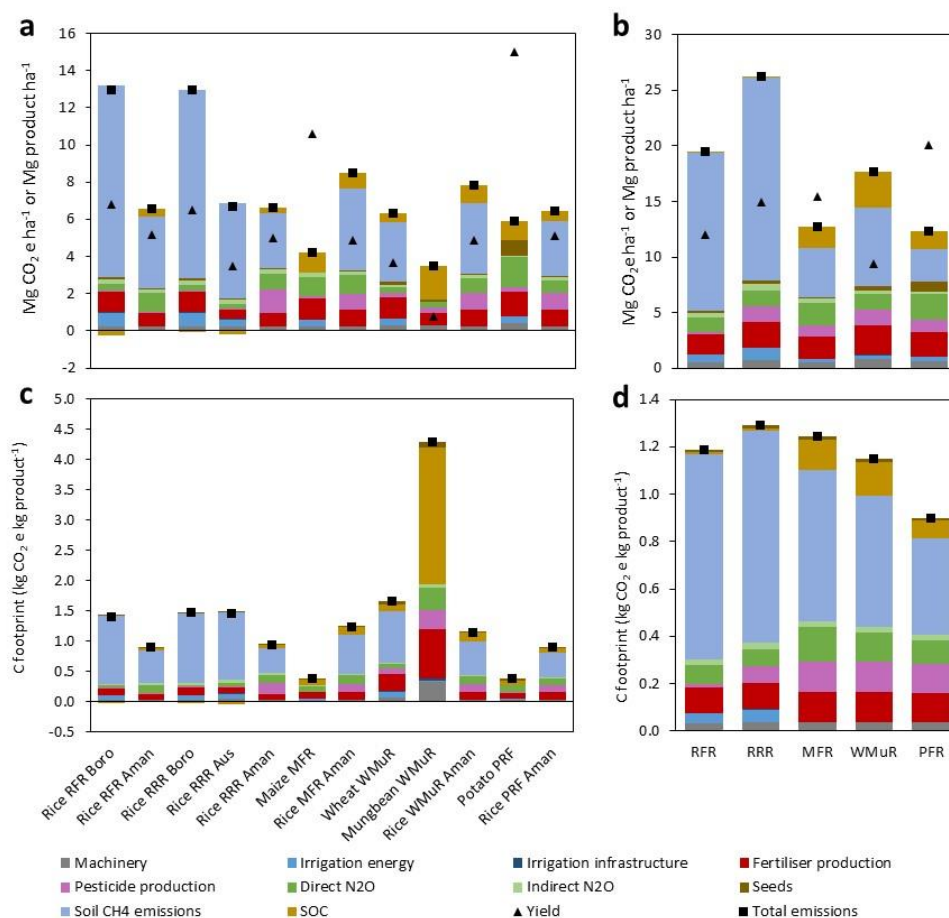

432

433 **Fig. 7** Area-based greenhouse gas (GHG) emissions (kg CO<sub>2</sub>e kg ha<sup>-1</sup>) and yield (Mg ha<sup>-1</sup>) of  
 434 studied products in all crop seasons (a) and over the full year in each cropping pattern (b),  
 435 Carbon (C) footprint (kg CO<sub>2</sub>e kg product<sup>-1</sup>) of studied products in all crop seasons (c) and  
 436 weighted average C footprint of rice in each crop pattern (d). RFR = Rice-Fallow-Rice, RRR  
 437 = Rice-Rice-Rice, MFR = Maize-Fallow-Rice, WmuR = Wheat-Mungbean-Rice, PFR =  
 438 Potato-Fallow-Rice



439 Though wheat is a dry land crop the cropping pattern containing W-Mu-R had higher CO<sub>2</sub>-e  
440 emissions than other two dry land crops, such as potato and maize, due to CH<sub>4</sub> emissions  
441 resulting from water-logging conditions. Cropping patterns containing dryland crops obtained  
442 higher yields than other rice-based patterns. Potato and maize-based patterns had the largest  
443 production, roughly 20.1 Mg CO<sub>2</sub>e ha<sup>-1</sup> and 15.48 Mg CO<sub>2</sub>e ha<sup>-1</sup>, respectively. The lowest yield  
444 was observed in Mungbean (0.8 Mg CO<sub>2</sub>e ha<sup>-1</sup>) and Mungbean-based pattern (9.4 Mg CO<sub>2</sub>e ha<sup>-1</sup>).  
445 Direct and indirect N<sub>2</sub>O also contributed to C footprint. The major portion of C footprint in  
446 P-R-F pattern was from N<sub>2</sub>O (2.6 Mg CO<sub>2</sub>e ha<sup>-1</sup>) and then in M-F-R (2.4 Mg CO<sub>2</sub>e ha<sup>-1</sup>) pattern  
447 and the lowest was in W-Mu-R pattern. Machinery and seed impeded effect on C footprint  
448 mostly in P-R-F pattern (Fig. 7b) while it was same for all the rice seasons (Fig. 7a) in every  
449 pattern. The contribution of pesticide production was higher R-R-R and W-Mn-R (1.42 Mg  
450 CO<sub>2</sub>e ha<sup>-1</sup>) and lower in R-F-R (0.18 Mg CO<sub>2</sub>e ha<sup>-1</sup>).

#### 451 **4. Discussion**

##### 452 **4.1 N<sub>2</sub>O emission from soil**

453 Direct N<sub>2</sub>O emissions were about half in rice and wheat (1.44 kg N<sub>2</sub>O-N ha<sup>-1</sup> yr<sup>-1</sup> on average),  
454 which were cultivated under water-logging conditions, then in dry land crops also intensively  
455 fertilized such as maize and potato (3.09 kg N<sub>2</sub>O-N ha<sup>-1</sup> yr<sup>-1</sup> on average). Maize emits 1.66 to  
456 4.09 MT CO<sub>2</sub>eq GHGs in growing seasons (Biswas et al., 2022). During rice production, pud-  
457 dling is operated which normally shuts the water transmission pores resulting in very low water  
458 percolation and gaseous exchange between water and air surface. Emissions of N<sub>2</sub>O are the  
459 result of microbial nitrification and denitrification in soils, controlled principally by soil water  
460 and mineral N contents, labile organic carbon, and temperature (Ferdous et al., 2022). Trans-  
461 formational modifications (anaerobic rice systems into aerobic) in rice cultivation practices  
462 sustain yield but at the cost of higher N loss (Farooq et al., 2022) with high N<sub>2</sub>O emissions.  
463 The highest emissions were in M-F-R pattern, P-R-F pattern had the second highest. Among  
464 the N sources synthetic fertilizer was the highest emitter because of high application rate, par-  
465 ticularly in maize and potato, which had the highest N input requirement (482 and 293 kg ha<sup>-1</sup>  
466 urea, respectively). In dry land the aerobic condition facilitates the nitrification process (ammo-  
467 nium-nitrite-nitrate), after irrigation (anaerobic condition) which provides the substrates of de-  
468 nitrification (nitrate-nitrogen dioxide-nitrous oxide) in crops with transitional (aerobic-anaero-  
469 bic) water state condition (Ferdous et al., 2022). For a rice-based cropping system, Islam et al.,  
470 2022 reported the effect of fertilizer, 50% from urea (synthetic) and 50% from poultry litter,  
471 on GHG emissions from rice fields during the aus and aman seasons in Bangladesh. According



472 to Jahangir et al. (2022), cumulative N<sub>2</sub>O emissions during the growing season increased sig-  
473 nificantly with increasing N application rates. Mazz et al. (2022) reported from their meta-  
474 analysis is that intensive rice system and SOC increase N<sub>2</sub>O emissions consistently, however,  
475 rice system has 57% lower emissions than other cereals whilst, maize has 71% higher N<sub>2</sub>O  
476 emissions than rice in Asia-Africa and the emissions increase by 5% with each percent increase  
477 in SOC. Chemical source of N also increases N<sub>2</sub>O emissions and about 0.4% increase of N<sub>2</sub>O  
478 is associated with addition of 1 kg N ha<sup>-1</sup> (Mazz et al., 2022).

479 Results from an increasing number of experiments using different N fertilizer rates showed that  
480 emissions of N<sub>2</sub>O respond exponentially to increasing N inputs in a variety of soil types, cli-  
481 mates, and fertilizer formulas (Hoben et al., 2011; Signor et al., 2013). However, the IPCC tier  
482 1 method that we have applied in this work is based on fixed emission factors of the applied N  
483 (depending on climate, flooding conditions and input type), which implies a linear relationship  
484 between N inputs and emissions. Therefore, more field studies are needed in Bangladesh and  
485 similar areas to improve N<sub>2</sub>O estimations in inventories and in LCA studies. Compared to all  
486 the four patterns R-F-R pattern had the lowest N<sub>2</sub>O emissions (3.13 kg N<sub>2</sub>O-N ha<sup>-1</sup> yr<sup>-1</sup>) may  
487 be due to the anaerobic condition, lower crop residues-weeds and lack of substrate for denitri-  
488 fication. According to a global meta-analysis by Chen et al. (2013), crop residues generated  
489 equivalent to or more N<sub>2</sub>O emissions than synthetic fertilizers, but another meta-analysis  
490 showed much lower emissions from crop residues (Charles et al., 2017).

491 However, according to Shan and Yan (2013), the addition of crop residue with synthetic ferti-  
492 lizer reduced N<sub>2</sub>O emissions by 11.7% when compared to synthetic fertilizers alone. The R-F-  
493 R had lower emissions than R-R-R may be attributed to the fallow period where the fallow  
494 period had only spontaneous weed growth with lower emissions but cropping pattern with three  
495 crops had emissions from each crop. However, contradictory statement from numerous studies  
496 stated that the N<sub>2</sub>O emissions from fertilized paddy fields during the fallow season is signifi-  
497 cantly larger than the N<sub>2</sub>O emissions during the cropping season (Abao et al., 2000).

498 There is a lack of data on indirect N<sub>2</sub>O emissions from different crop fields. Loss of N through  
499 volatilization and leaching are not included in many studies but they can represent an important  
500 contribution to fertilizer-related global warming through indirect N<sub>2</sub>O emissions (Aguilera et  
501 al., 2021b).

#### 502 **4.2 Methane emission and soil organic carbon balance**

503 Carbon input was the highest for the R-F-R and R-R-R patterns where the inputs were mostly  
504 done through crop residues, and weeds and according to this, the R-R-R and R-F-R patterns



505 showed the highest soil CH<sub>4</sub> emission. These emissions were also present in all rice treatments  
506 and in wheat. Our finding of significant soil CH<sub>4</sub> emissions in wheat cultivation (representing  
507 51% of the GWP of this crop) is, to our knowledge, unprecedented in the literature, and  
508 indicates the need to study the extent of rice cultivation under these soil conditions in  
509 Bangladesh and in other parts of the world, in order to know the magnitude of these soil CH<sub>4</sub>  
510 emissions. The emissions were absent in maize, potato and mungbean crop. In conventional  
511 practice rice is grown under continuous flooding (anaerobic) conditions which is the  
512 prerequisite for CH<sub>4</sub> emissions. Methane is the final product of anaerobic breakdown of SOM  
513 by the action of methanogens in wetland paddy field, absence of oxygen is required for the  
514 function of methanogens. On flooding, short-term evolution of hydrogen immediately follows  
515 the disappearance of oxygen, CO<sub>2</sub> increases, and, with decreasing carbon dioxide, methane  
516 formation increases (Neue and Scharpenseel 1984). Methane is largely produced by  
517 transmethylation of acetic acid and, to some extent, by the reduction of CO<sub>2</sub> (Takai 1970). In  
518 R-R-R and R-F-R cropping pattern the cover crops, crop residues and weeds were present  
519 where they act as carbon source to form volatile acids i.e., acetic acid. Large portions of  
520 methane formed in an anaerobic soil may remain trapped in the flooded soil. Entrapped  
521 methane may be oxidized to carbon dioxide when the floodwater is drained during the rice  
522 growing season or when the soil dries at the end of or after the rice growing season. But large  
523 amounts of entrapped methane may escape to the atmosphere immediately after the floodwater  
524 recede. The low solubility of methane in water limits its diffusive transport in the flooded soil,  
525 and most methane is oxidized to carbon dioxide via methanol, formaldehyde, and format as it  
526 passes the aerobic soil-water interface. The release of methane by diffusion through the wet  
527 soil column is negligible in clayey soil, but it may become significant in sandy soils in which  
528 bigger pores between soil particles prevail. The rate and pattern of organic matter addition and  
529 decomposition determine the rate and pattern of methane formation. Wheat also needs less  
530 irrigation, but the studied field had moist condition throughout the season due to near water  
531 table, which caused CH<sub>4</sub> emissions from wheat field. Large portions of CH<sub>4</sub> formed in an  
532 anaerobic soil may remain trapped in the flooded soil. Therefore, crop residues through soil  
533 CH<sub>4</sub> emission have contributed to the highest CO<sub>2</sub>e emission. Similar results were found by  
534 Vu et al., (2015) in their study, the lowest CH<sub>4</sub> emission was found in mineral fertilizer  
535 compared to the highest value for farmyard manure and compost manure. This is due to the  
536 inclusion of materials that are rich in quickly biodegradable organic matter and offered readily  
537 biodegradable C sources for CH<sub>4</sub> synthesis (Vu et al., 2015). Yagi and Minami (1990) found  
538 that the average value for CH<sub>4</sub> flux in rice straw was higher in comparison to the compost and



539 mineral-treated plots. Zhang et al. (2017) found that residue retention increased CH<sub>4</sub> emission  
540 by two times compared to the paddy fields where residue retention did not take place. Sanchis  
541 et al. (2012) reported that continuously flooded rice fields without any added straw produced  
542 average CH<sub>4</sub> emissions that were 93% higher compared to rainfed, intermittently flooded, or  
543 non-flooded irrigated water management. That means, independent of the addition of organic  
544 matter to the soil, continual flooding can foster the conditions for CH<sub>4</sub> production. However,  
545 organic fertilizers and flood irrigation also promote C sequestration, which can result in  
546 reduced net GHG emissions despite higher CH<sub>4</sub> emissions (Shang et al., 2021). In the R-F-R  
547 pattern, there was a fallow period, and also the SOC sequestration for boro rice was  
548 approximately 0.23 Mg CO<sub>2</sub> ha<sup>-1</sup> and aus sequestered 0.17 Mg CO<sub>2</sub> ha<sup>-1</sup> in R-R-R though the  
549 emissions were the highest for rice crop. As a result, R-F-R and R-R-R had higher CH<sub>4</sub>  
550 emissions but they were also the only crops which were able to sequester C in soil. In our  
551 study, the estimated magnitude of this sequestration was very low in terms of GWP compared  
552 to CH<sub>4</sub> emissions, but long-term field studies are needed to verify these results and to assess  
553 SOC changes in the R-F-R rotation, which we assumed to be at equilibrium.

#### 554 **4.3 Greenhouse gas emissions and carbon footprint**

555 Methane was the main component of the GHG balance and C footprints of the studied crops  
556 cultivated under flooded or waterlogging conditions, including rice but also wheat. The domi-  
557 nance of soil CH<sub>4</sub> emissions in the C footprint of rice is well established in the literature. For  
558 example, Poore and Nemecek (2018) found that soil CH<sub>4</sub> emissions represented 28-82% of life  
559 cycle rice GHG emissions in a comprehensive global meta-analysis. This result is also in line  
560 with previous LCA studies in our study region. For example, Alam et al., 2019 found that on-  
561 farm CH<sub>4</sub> emissions were the largest contributor to overall emissions in the monsoon paddy in  
562 Bangladesh. They also verified that, regardless of retained residue levels, CH<sub>4</sub> is produced dur-  
563 ing the organic matter decomposition process in anaerobic soil conditions in the profile of both  
564 puddled and non-puddled submerged fields. In non-flooded crops the GHG was mostly at-  
565 tributed to CF application. In wheat field the irrigation requirement was lower than rice but the  
566 studied field was always with high moisture level which might be a reason of CH<sub>4</sub> emissions.  
567 The C footprint values of paddy rice production found in our study, ranging 0.9-1.46 kg CO<sub>2</sub>e  
568 kg<sup>-1</sup>, are lower than the global median values (2.4 and 1.68 kg CO<sub>2</sub>e kg<sup>-1</sup>, after converting the  
569 value from milled rice) reported by Poore and Nemecek (2018) and Clune (2017) respectively.  
570 Our results are also lower to those of another study in Bangladesh (3.15 kg CO<sub>2</sub>e kg<sup>-1</sup>, Jimmy  
571 et al., 2017) but similar to other studies in this country, e.g., 1.11-1.57 kg CO<sub>2</sub>e kg<sup>-1</sup> by Alam



572 et al. (2016), and 1.35 kg CO<sub>2</sub>e kg<sup>-1</sup> (after converting from milled rice) reported by Shew et al.  
573 (2019). In Bangladesh about 293 kg CO<sub>2</sub>e ha<sup>-1</sup> d<sup>-1</sup> GWP was found in boro rice growing season  
574 (Jahangir et al., 2022) and in this study it was about 13 Mg CO<sub>2</sub>e ha<sup>-1</sup> emissions. We found 4.20  
575 Mg CO<sub>2</sub>e ha<sup>-1</sup> emissions in maize where few references are provided here where the found  
576 about 4.9 Mg CO<sub>2</sub>e ha<sup>-1</sup> emissions (Biswas et al., 2022) in Bangladesh, 3.4 Mg CO<sub>2</sub>e ha<sup>-1</sup> emis-  
577 sions in India (Jain et al., 2016) and 14.8 Mg CO<sub>2</sub>e ha<sup>-1</sup> emissions (Zhang et al, 2017) in China.  
578 These values were used as total emissions for a crop since there was no regional data available  
579 in Bangladesh, there were huge variations in GHG emissions because of field management,  
580 seasonal variation, residue management and mostly fertilization rates.

581

#### 582 **4.4 Co-designed carbon footprint calculation tool**

583 The participative approach to develop the carbon footprint calculation tool allows for the  
584 incorporation of a wide range of perspectives and expertise, resulting in a comprehensive and  
585 accurate assessment of GHG emissions. It is also highly versatile, with the possibility to  
586 incorporate changes in the assumptions, parameters, and data that are used in the calculations.  
587 This tool can be useful for identifying opportunities for reducing GHG emissions. By providing  
588 a detailed understanding of the sources of emissions, as well as C and N flows, co-designed  
589 calculation tool can help identify specific areas where changes in practices or technologies  
590 could lead to significant reductions in emissions. This can be especially valuable for  
591 policymakers and industry representatives, as it can inform the development of more effective  
592 and targeted policies and strategies for reducing emissions. However, this tool is not a one-  
593 time solution but a continuous process, it needs to be regularly updated to reflect the latest  
594 research and data, and new technologies and practices that may emerge.

#### 595 **5. Conclusion**

596 There are many cropping systems followed in Bangladesh for enhancing cropping intensity  
597 and increasing crop production, but GHG emissions from agricultural fields are rarely reported.  
598 We used a co-designed C footprint calculation tool to estimate the emitted GHG and the C  
599 footprint from typical cropping systems in Bangladesh. It was found that rice-based cropping  
600 pattern with dryland crops had higher N<sub>2</sub>O than sole rice-based cropping systems but CH<sub>4</sub>  
601 emissions were higher in sole rice-based patterns, resulting in higher GHG emissions and C  
602 footprint overall. Methane contributed about 50-80% of total GHG emissions from upstream-  
603 downstream and crop production. Among the rice-based cropping systems, boro and aus from



604 R-F-R and R-R-R patterns sequestered C in soil, although this had a negligible effect on the C  
605 footprint. A novel finding of this study is the presence of CH<sub>4</sub> emissions from wheat field, as  
606 the field was under moist condition throughout the season. The IPCC Tier 1 value was only  
607 available for rice seasons (aus, aman and boro) and measured data only available for boro and  
608 wheat so further study is required for validation and developing suitable GHG mitigation  
609 strategies in agricultural fields in Bangladesh.

#### 610 **Disclosure statement**

611 There is no conflict of interests.

#### 612 **Acknowledgement**

613 This research was financially supported by the Soil and Water Management & Crop Nutrition,  
614 Joint FAO/IAEA Division of Nuclear Techniques in Food & Agriculture, Vienna, Austria  
615 under the CRP D1.50.20 project.

### 616 **6. Supplementary information**

#### 617 **6.1 Allocation of the Product Value**

618 Based on product value, products shared 79–100% of the greenhouse gas emissions in different  
619 crops, while residues shared the rest of the percentage (Suppl. 1). As residue of maize,  
620 mungbean, and potato have no price/market value, it has no contribution in the systems,  
621 whereas the products contribute 100% due to its product value. Among rice, rainfed T. aman  
622 rice residue has the highest contribution as it's large proportion (90%) is used as co-product  
623 and high price of residue in Bangladesh. Supplementary data associated with this article is  
624 presented in Suppl. 1.

625

#### 626 **Author contributors**

- 627 • MMR. Jahangir (Professor of Dept. of Soil Science, Bangladesh Agricultural Univer-  
628 sity) worked on research planning, data interpretation and paper editing.
- 629 • C. Müller (Professor of Institute of Plant Ecology (IFZ), Justus-Liebig University Gies-  
630 sen, Germany and School of Biology and Environmental Science and Earth Institute,  
631 University College Dublin, Belfield, Dublin, Ireland) worked on research planning, and  
632 paper editing.



- 633 • M. Zaman (Technical Officer, Soil and Water Management and Crop Nutrition, Joint  
634 FAO/IAEA Division of Nuclear Techniques in Food and Agriculture, Vienna, Austria)  
635 and Hassan Ahmad (M.S student) contribution in methodological development.  
636 • J. Ferdous (Lecturer, Dept. of Soil Science, Bangladesh Agricultural University), F.  
637 Mahjabin, A.A. Asif (post-graduate students at Bangladesh Agricultural University)  
638 worked on data processing, analysis, data interpretation and writing.  
639 • E. Aguilera (Post-doc, CEIGRAM, Universidad Politécnica de Madrid, Madrid, Es-  
640 paña), Maximilian Bauer (), Alberto Sanz Cobeña (Professor, CEIGRAM, Universidad  
641 Politécnica de Madrid, Madrid, España) worked for the development of co-designed  
642 carbon footprint calculation tool.  
643

#### 644 **References**

- 645 Abao, E. B., Bronson, K. F., Wassmann, R., and Singh, U.: Simultaneous records of methane  
646 and nitrous oxide emissions in rice-based cropping systems under rainfed  
647 conditions. *Methane Emissions from Major Rice Ecosystems in Asia*. *Dev. Plant Soil*  
648 *Sci.*, Springer, 131-139, [https://doi.org/10.1007/978-94-010-0898-3\\_12](https://doi.org/10.1007/978-94-010-0898-3_12), 2000.
- 649 Abuarab, M. E., El-Mogy, M. M., Hasan, A. M., Abdeldaym, E. A., Abdelkader, N. H., and  
650 El-Sawy, M. B. I.: The effects of root aeration and different soil conditioners on the  
651 nutritional values, yield, and water productivity of potato in clay loam soil, *Agron.*, 9,  
652 418, <https://doi.org/10.3390/agronomy9080418>, 2019.
- 653 Aguilera, E., Guzmán, G. I., Alvaro-Fuentes, J., Infante-Amate, J., García-Ruiz, R., Carranza-  
654 Gallego, G., Soto, D., and González De Molina, M.: A historical perspective on soil  
655 organic carbon in Mediterranean cropland (Spain, 1900-2008), *Sci. Total Environ.*, 621,  
656 634-648, <https://doi.org/10.1016/j.scitotenv.2017.11.243>, 2018.
- 657 Aguilera, E., Reyes-Palomo, C., Díaz-Gaona, C., Sanz-Cobena, A., Smith, P., García-  
658 Laureano, R., and Rodríguez-Estévez, V.: Greenhouse gas emissions from  
659 Mediterranean agriculture: Evidence of unbalanced research efforts and knowledge gaps,  
660 *Glob. Environ. Change.*, 69, 102319, [doi.org/10.1016/j.gloenvcha.2021.102319](https://doi.org/10.1016/j.gloenvcha.2021.102319), 2021a.





- 661 Aguilera, E., Sanz-Cobena, A., Infante-Amate, J., García-Ruiz, R., Vila-Traver, J., Guzmán,  
662 G. I., González de Molina, M., Rodríguez, A., Piñero, P., and Lassaletta, L.: Long-term  
663 trajectories of the C footprint of N fertilization in Mediterranean agriculture (Spain,  
664 1860–2018). *Environ. Res. Lett.*, 16, 085010, [https://doi.org/10.1088/1748-](https://doi.org/10.1088/1748-9326/ac17b7)  
665 9326/ac17b7, 2021b.
- 666 Ahmad, A., Zoli, M., Latella, C., Bacenetti, J.: Rice cultivation and processing: Highlights  
667 from a life cycle thinking perspective. *Sci. Total Environ.*, 871, 162079,  
668 <https://doi.org/10.1088/1748-9326/ac17b7>, 2023.
- 669 Alam, M.K., Bell, R.W., and Biswas, W.K.: Decreasing the carbon footprint of an intensive  
670 rice-based cropping system using conservation agriculture on the Eastern Gangetic  
671 Plains. *J. Clean. Prod.*, 218, 259-272, [doi.org/10.1016/j.jclepro.2019.01.328](https://doi.org/10.1016/j.jclepro.2019.01.328), 2019.
- 672 Begum, R., Jahangir, M. M. R., Jahiruddin, M., Islam, M. R., Bokhtiar, S. M., and Islam, K.  
673 R.: Reduced tillage with residue retention improves labile carbon pools and manage-  
674 ment indices of soils in a seven-year trial with wheat-mung bean-rice rotation, *Pe-*  
675 *dosphere*, 89, 2117-2126, [https://doi.org/10.1016/S1002-0160\(xx\)60xxx-x](https://doi.org/10.1016/S1002-0160(xx)60xxx-x), 2022.
- 676 Biswas, J. C., Mamiruzzaman, M., Haque, M. M., Hossain, M. B., Naher, U. A., Akhtar, S.,  
677 and Biswas, J. K.: Greenhouse gas emissions from paddy fields in Bangladesh com-  
678 pared to top twenty rice producing countries and emission reduction strategies, *Paddy*  
679 *Water Environ.*, 20(3), 381-393, <https://doi.org/10.1007/s10333-022-00899-2>, 2022.
- 680 Charles, A., Rochette, P., Whalen, J. K., Angers, D. A., Chantigny, M. H., and Bertrand, N.:  
681 Global nitrous oxide emission factors from agricultural soils after addition of organic  
682 amendments: A meta-analysis, *Agri. Ecosyst. Environ.*, 236, 88-98,  
683 <https://doi.org/10.1016/j.agee.2016.11.021>, 2017.

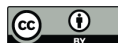

- 684 Chen, H., Li, X., Hu, F., and Shi, W.: Soil nitrous oxide emissions following crop residue  
685 addition: a meta-analysis, *Glob. Change Biol.*, 19(10), 2956-2964,  
686 <https://doi.org/10.1111/gcb.12274>, 2013.
- 687 Chen, X. P., Cui, Z. L., Fan, M. S., Peter, V., Zhao, M., Ma, W. Q., Wang, Z. L., Zhang, W. J.,  
688 Yan, X. Y., Yang, J. C., Deng, X. P., Gao, Q., Zhang, Q., Guo, S. W., Ren, J., Li, S. Q.,  
689 Ye, Y. L., Wang, Z. H., Huang, J. L., and Zhang, F. S.: Producing more grain with lower  
690 environmental costs, *Nature*, 514, 486–489,  
691 <https://doi.org/10.1016/j.resconrec.2021.105661>, 2014.
- 692 Clune, S., Crossin, E., and Verghese, K.: Systematic review of greenhouse gas emissions for  
693 different fresh food categories, *J. Clean. Prod.*, 140, 766-783,  
694 <https://doi.org/10.1016/j.jclepro.2016.04.082>, 2017.
- 695 Coleman, K., and Jenkinson, D.S.: RothC-26.3 - A Model for the turnover of carbon in soil.  
696 In: Powlson, D.S., Smith, P., Smith, J.U. (Eds.), *Evaluation of Soil Organic Matter*  
697 *Models*, Springer Berlin Heidelberg, Berlin, Heidelberg, 237-246,  
698 [https://doi.org/10.1007/978-3-642-61094-3\\_17](https://doi.org/10.1007/978-3-642-61094-3_17), 1996.
- 699 FAO: *The Future of Food and Agriculture—Trends and Challenges*, Food and Agriculture  
700 Organization of the United Nations., Rome, Italy, 163, 2017.
- 701 FAO: FAOSTAT—FAO database for food and agriculture, Rome: Food and agriculture  
702 Organisation of United Nations (FAO), 2023.
- 703 FAO: IIASA, *Harmonized World Soil Database version 2.0*, Rome and Luxenburg, 2023.
- 704 Farooq, M. S., Uzair, M., Maqbool, Z., Fiaz, S., Yousuf, M., Yang, S. H. and Khan, M. R.:  
705 Improving nitrogen use efficiency in aerobic rice based on insights into the  
706 ecophysiology of archaeal and bacterial ammonia oxidizers, *Front. Plant Sci.* 13, 913204,  
707 <https://doi.org/10.3389/fpls.2022.913204>, 2022.



- 708 Ferdous, J., Mumu, N. J., Hossain, M. B., Hoque, M. A., Zaman, M., Müller, C., and Jahangir,  
709 M. M. R.: Co-application of biochar and compost with decreased N fertilizer reduced  
710 annual ammonia emissions in wetland rice, *Front. Sustain. Food Syst.*, 6, 1067112.  
711 <http://doi.org/10.3389/fsufs.2022.1067112>, 2023.
- 712 Foley, J., Ramankutty, N., and Brauman, K.: Solutions for a cultivated  
713 planet, *Nature*, 478, 337–342, <https://doi.org/10.1038/nature10452>, 2011.
- 714 Forster, P., Storelvmo, T., Armour, K., Collins, W., Dufresne, J. L., Frame, D., Lunt, D. J.,  
715 Mauritsen, T., Palmer, M. D., Watanabe, M., Wild, M., and Zhang, H.: The Earth's  
716 Energy Budget, Climate Feedbacks, and Climate Sensitivity. In: Masson-Delmotte, V.,  
717 Zhai, P., Pirani, A., Connors, S. L., Péan, C., Berger, S., Caud, N., Chen, Y., Goldfarb,  
718 L., Gomis, M. I., Huang, M., Leitzell, K., Lonnoy, E., Matthews, J. B. R., Maycock, T.  
719 K., Waterfield, T., Yelekçi, O., Yu, R., Zhou, B. (Eds.), *Climate Change 2021: The*  
720 *Physical Science Basis, Contribution of Working Group I to the Sixth Assessment Report*  
721 *of the Intergovernmental Panel on Climate Change*, Cambridge University Press,  
722 Cambridge, United Kingdom and New York, NY, USA, 923–1054, 2021.
- 723 FRG: Fertilizer Recommendation Guide-2018, Farmgate: Bangladesh Agricultural research  
724 Council (BARC), 2018.
- 725 Gross, C. D., Bork, E., Carlyle, C. N., and Chang, S. X.: Biochar and its manure-based  
726 feedstock have divergent effects on soil organic carbon and greenhouse gas emissions in  
727 croplands, *Sci. Total Environ.*, 806, 151337,  
728 <https://doi.org/10.1016/j.scitotenv.2021.151337>, 2021.
- 729 Harris, I., Osborn, T. J., Jones, P., and Lister, D.: Version 4 of the CRU TS monthly high-  
730 resolution gridded multivariate climate dataset, *Scientific Data*, 7, 109,  
731 <https://doi.org/10.1038/s41597-020-0453-3>, 2020.



- 732 Hoben, J. P., Gehl, R. J., Millar, N., Grace, P. R., and Robertson, G. P.: Nonlinear nitrous oxide  
733 (N<sub>2</sub>O) response to N fertilizer in on-farm corn crops of the US Midwest, *Glob. Chang.*  
734 *Biol.*, 17 (2), 1140–1152, <https://doi.org/10.1111/j.1365-2486.2010.02349.x>, 2011.
- 735 IPCC: Climate Change 2014: Synthesis Report. Contribution of Working Groups I, II and III  
736 to the Fifth Assessment Report of the Intergovernmental Panel on Climate  
737 Change (IPCC), Geneva, Switzerland, 151, 2014.
- 738 Islam, S. M., Gaihre, Y. K., Islam, M. R., Ahmed, M. N., Akter, M., Singh, U., and Sander, B.  
739 O.: Mitigating greenhouse gas emissions from irrigated rice cultivation through improved  
740 fertilizer and water management. *J. Environ. Manag.*, 307, 114520.  
741 <https://doi.org/10.1016/j.jenvman.2022.114520>, 2022.
- 742 Islam, S. M., Gaihre, Y. K., Islam, M. R., Akter, M., Al Mahmud, A., Singh, U., and Sander,  
743 B.O.: Effects of water management on greenhouse gas emissions from farmers' rice fields  
744 in Bangladesh, *Sci. Total Environ.*, 734, 139382,  
745 <https://doi.org/10.1016/j.scitotenv.2020.39382>, 2020.
- 746 Jahangir, M. M. R., Bell, R. W., Uddin, S., Ferdous, J., Nasreen, S. S., Haque, M. E., and  
747 Müller, C.: Conservation Agriculture with Optimum Fertilizer N Rate Reduces GWP for  
748 Rice Cultivation in Floodplain Soils, *Front. Environ. Sci.*, 291,  
749 <https://doi.org/10.3389/fenvs.2022.853655>, 2022.
- 750 Jeffery, S., Verheijen, F. G., Kammann, C. and Abalos, D.: Biochar effects on methane  
751 emissions from soils: a meta-analysis. *Soil Biol, Biochem.*, 101, 251-258,  
752 <https://doi.org/10.1016/j.soilbio.2016.07.021>, 2016.
- 753 Lakshman, K., Chandrakala, M., Prasad, P. S., Babu, G. P., Srinivas, T., Naik, N. R. and Korah,  
754 A.: Liquid Nano-Urea: An Emerging Nano Fertilizer Substitute for Conventional  
755 Urea. *Chronic. Biores. Manag.*, 6, 054-059, 2022.



- 756 Liang, X. Q., Chen, Y. X., Li, H., Tian, G. M., Ni, W. Z., He, M. M., and Zhang, Z. J.: Modeling  
757 transport and fate of N from urea applied to a near-trench paddy field, *Environ. Pollu.*,  
758 150, 313–320, <https://doi.org/10.1016/j.envpol.2007.02.003>, 2007.
- 759 Lin, Y., Watts, D. B., van Santen, E., and Cao, G.: Influence of poultry litter on crop  
760 productivity under different field conditions: A meta-analysis, *Agron.*, 110, 807,  
761 <https://doi.org/10.2134/agronj2017.09.0513>, 2018.
- 762 Maaz, T. M., Sapkota, T. B., Eagle, A. J., Kantar, M. B., Bruulsema, T. W. and Majumdar, K.:  
763 Meta-analysis of yield and nitrous oxide outcomes for nitrogen management in agricul-  
764 ture, *Glob. Chang. Biol.*, 27(11), 2343-2360, <https://doi.org/10.1111/gcb.15588>, 2021.
- 765 Moslehuddin, A. Z. M, Laizoo S., and Kazuhiko E.: Fertility status of Bangladesh soils-A  
766 review, *J. Facul. Agri., Kyushu University*, 257-267, 1997.
- 767 Neue, H. U., and Scharpenseel, H. W.: Gaseous products of the decomposition of organic  
768 matter in submerged soils, *Organic matter and rice*, 311, 328, 1984.
- 769 Poore, J., and Nemecek, T.: Reducing food’s environmental impacts through producers and  
770 consumers, *Sci.*, 360, 987-992, <https://doi.org/10.1126/science.aag0216>, 2018.
- 771 Sanchis, E., Ferrer, M., Torres, A. G., Cambra-López, M., and Calvet, S.: Effect of water and  
772 straw management practices on methane emissions from rice fields: a review through a  
773 meta-analysis, *Environ. Eng. Sci.*, 29 (12), 1053-1062,  
774 <https://doi.org/10.1089/ees.2012.0006>, 2012.
- 775 Sanz-Cobena, A., Lassaletta, L., Estellés, F., Del Prado, A., Guardia, G., Abalos, D., and Billen,  
776 G.: Yield-scaled mitigation of ammonia emission from N fertilization: the Spanish  
777 case, *Environ. Res. Lett.*, 9 (12), 125005, [https://doi.org/10.1088/1748-](https://doi.org/10.1088/1748-9326/9/12/125005)  
778 [9326/9/12/125005](https://doi.org/10.1088/1748-9326/9/12/125005), 2014.
- 779 Sarkar, M. I. U., Jahan, A., Haque, M. M., Islam, S. M. M., Ahmed, M. N., and Islam, M. R.:  
780 Long term effects of integrated plant nutrition system on rice yield, N dynamics and

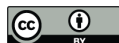

- 781           biochemical properties in soil of rice–rice cropping system, A. J. Soil Sci. Plant Nutri.,  
782           4, 1–14, <https://doi.org/10.9734/AJSSPN/2019/v4i430050>, 2019.
- 783   Sarker, M. M. H., Moslehuddin, A. Z. M., Jahiruddin, M., and Islam, M. R.: Available status  
784           and changing trend of micronutrients in floodplain soils of Bangladesh, SAARC J.  
785           Agri., 16 (1), 35-48, <http://dx.doi.org/10.3329/sja.v16i1.37421>, 2018.
- 786   Shan, J. and Yan, X.: Effects of crop residue returning on nitrous oxide emissions in  
787           agricultural           soils, Atmos.           Environ.,           71,           70-175,  
788           <https://doi.org/10.1016/j.atmosenv.2013.02.009>, 2013.
- 789   Shang, Z., Abdalla, M., Xia, L., Zhou, F., Sun, W. and Smith, P.: Can cropland management  
790           practices lower net greenhouse emissions without compromising yield? Glob. Chang.  
791           Biol., 27(19), 4657-4670, <https://doi.org/10.1111/gcb.15796>, 2021.
- 792   Signor, D., Cerri, C. E. P., and Conant, R.: N<sub>2</sub>O emissions due to N fertilizer applications in  
793           two regions of sugarcane cultivation in Brazil, Environ. Res., 8 (1), 01,  
794           <https://doi.org/10.1088/1748-9326/8/1/015013>, 2013.
- 795   Sindelar, A. J., Coulter, J. A., Lamb, J. A., and Vetsch, J. A.: N, stover, and tillage management  
796           affect N use efficiency in continuous corn. Agron, Soil Environ. Quality, 107, 843–  
797           850, <https://doi.org/10.2134/agronj14.0535>, 2015.
- 798   Šturm, M., Kacjan-Maršić, N., Zupanc, V., Bračič-Železnik, B., Lojen, S., and Pintar, M.:  
799           Effect of different fertilisation and irrigation practices on yield, nitrogen uptake and  
800           fertiliser use efficiency of white cabbage (*Brassica oleracea* var. capitata L.), Sci.  
801           Hortic., 125(2), 103-109, <https://doi.org/10.1016/j.scienta.2010.03.017>, 2010.
- 802   Thangarajan, R., Bolan, N. S., Tian, G., Naidu, R., and Kunhikrishnan, A.: Role of organic  
803           amendment application on greenhouse gas emission from soil, Sci. Total Environ., 465,  
804           72-96, <https://doi.org/10.1016/j.scitotenv.2013.01.031>, 2013.



- 805 The World Bank: World Development Indicators. The World Bank IBRD-IDA,  
806 <https://databank.worldbank.org/reports.aspx?source=World-Development-ndicators#>,  
807 2023.
- 808 Udmale, P., Ishidaira, H., Thapa, B. R. and Shakya, N. M.: The status of domestic water  
809 demand: supply deficit in the Kathmandu Valley, Nepal, *Water*, 8(5), 196,  
810 <https://doi.org/10.3390/w8050196>, 2016.
- 811 Vu, Q. D., de Neergaard, A., Tran, T. D., Hoang, Q. Q., Ly, P., Tran, T. M., and Jensen, L. S.:  
812 Manure, biogas digestate and crop residue management affects methane gas emissions  
813 from rice paddy fields on Vietnamese smallholder livestock farms, *Nutr. Cycl.*  
814 *Agroecosystems*, 103, 329-346, <https://doi.org/10.1007/s10705-015-9746-x>, 2015.
- 815 Yadav, G.S., Das, A., Lal, R., Babu, S., Meena, R. S., Saha, P., Singh, R., and Datta, M.: Energy  
816 budget and carbon footprint in a no-till and mulch-based rice–mustard cropping system,  
817 *J. Clean. Prod.*, 191, 144–157, <https://doi.org/10.1016/j.jclepro.2018.04.173>, 2018.
- 818 Yagi, K., and Minami, K.: Effect of organic matter application on methane emission from some  
819 Japanese paddy fields, *Soil Sci. Plant Nutr.*, 36, 599-610,  
820 <https://doi.org/10.1080/00380768.1990.10416797>, 1990.
- 821 Zaman, M., Kleineidam, K., Bakken, L., Berendt, J., Bracken, C., Butterbach-Bahl, K., and  
822 Müller, C.: Methodology for measuring greenhouse gas emissions from agricultural soils  
823 using non-isotopic techniques. *Measuring Emission of Agricultural Greenhouse Gases*  
824 *and Developing Mitigation Options using Nuclear and Related Techniques: Applications*  
825 *of Nuclear Techniques for GHGs*, <https://doi.org/10.1007/978-3-030-55396-8>, 2021.
- 826 Zhang, D., Shen, J., Zhang, F., Li, Y., and Zhang, W.: Carbon footprint of grain production in  
827 China. *Science.*, 7, 4126, <https://doi.org/10.1038/s41598-017-04182-x>, 2017.
