# Supplementary figures and images for: Carbon footprint and greenhouse gas emissions from rice based agricultural systems calculated with a co-designed carbon footprint calculation tool
Source: Copernicus journal article supplement (doi:10.5194/bg-2023-165), 2023-09-26

Fig. 8

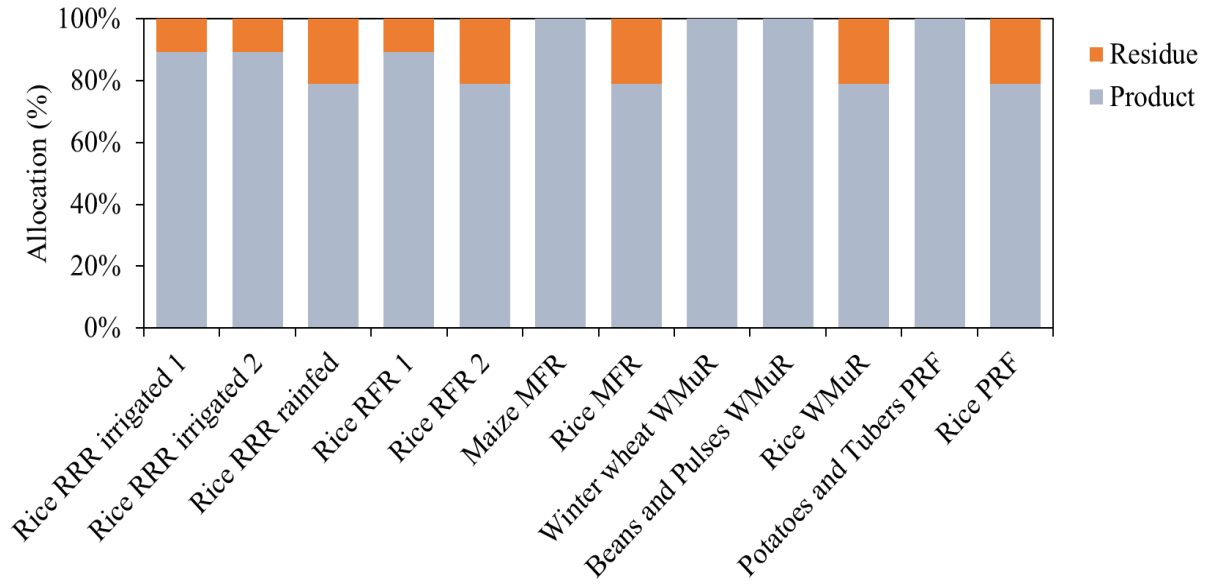

Supplement: Supplementary file 1 [file bg-2023-165-supplement.pdf]
